# Supplementary material for: Predicting the conformational variability of oncogenic GTP-bound G12D mutated KRas-4B proteins at zwitterionic model cell membranes
Source: Royal Society of Chemistry journal article supplement (doi:10.1039/d1nr07622a), 2022-01-01
Supplement: d1nr07622a1.pdf [file d1nr07622a1.pdf]

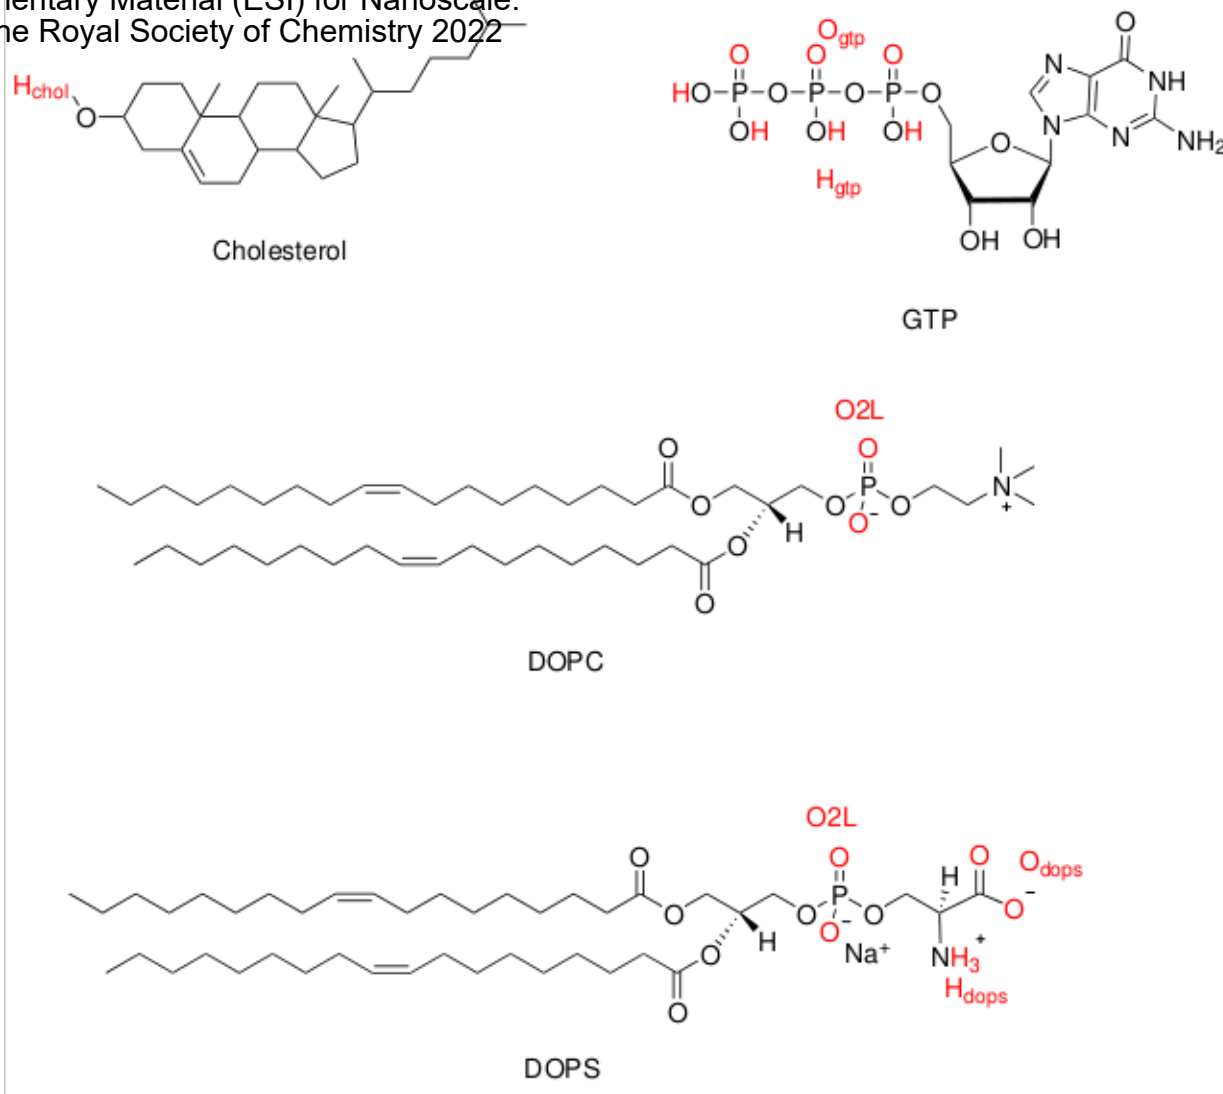

10

20

30

40

50

60

70

80

90

MTEYKLVVV**G**A**D**GVGKSAL**I**IQLIQNH**F**V**D**EYDPTIED**S**YRKQVV**I**DGE**I**CLLDILD**T**A**G**QEEYSAMR**D**Q**Y**MRTGEG**F**L**C**VFAIN**T**KS**F**E**D**I**H**H  
YREQ**I**KRVK**D**SE**D**V**P**MLVGN**K**CD**L**PSRTVD**T**K**Q**A**Q**DLARS**Y**G**I****P**FIETSA**K**TR**Q**GVDDAF**Y**TL**V**REIRKH**E**KE**K**MSKD**G**KKKK**K****K****S****P**KTK**C**<sub>f</sub>-**O**CH<sub>3</sub>

100

110

120

130

140

150

160

170

180

KRas-4B-FMe

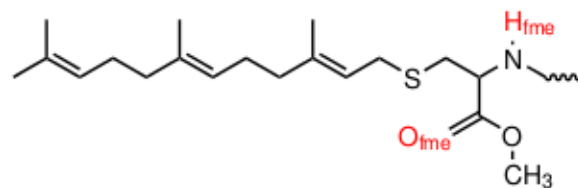

Farnesyl
