# Supplementary figures and images for: Predicting the conformational variability of oncogenic GTP-bound G12D mutated KRas-4B proteins at zwitterionic model cell membranes
Source: Royal Society of Chemistry journal article supplement (doi:10.1039/d1nr07622a), 2022-01-01

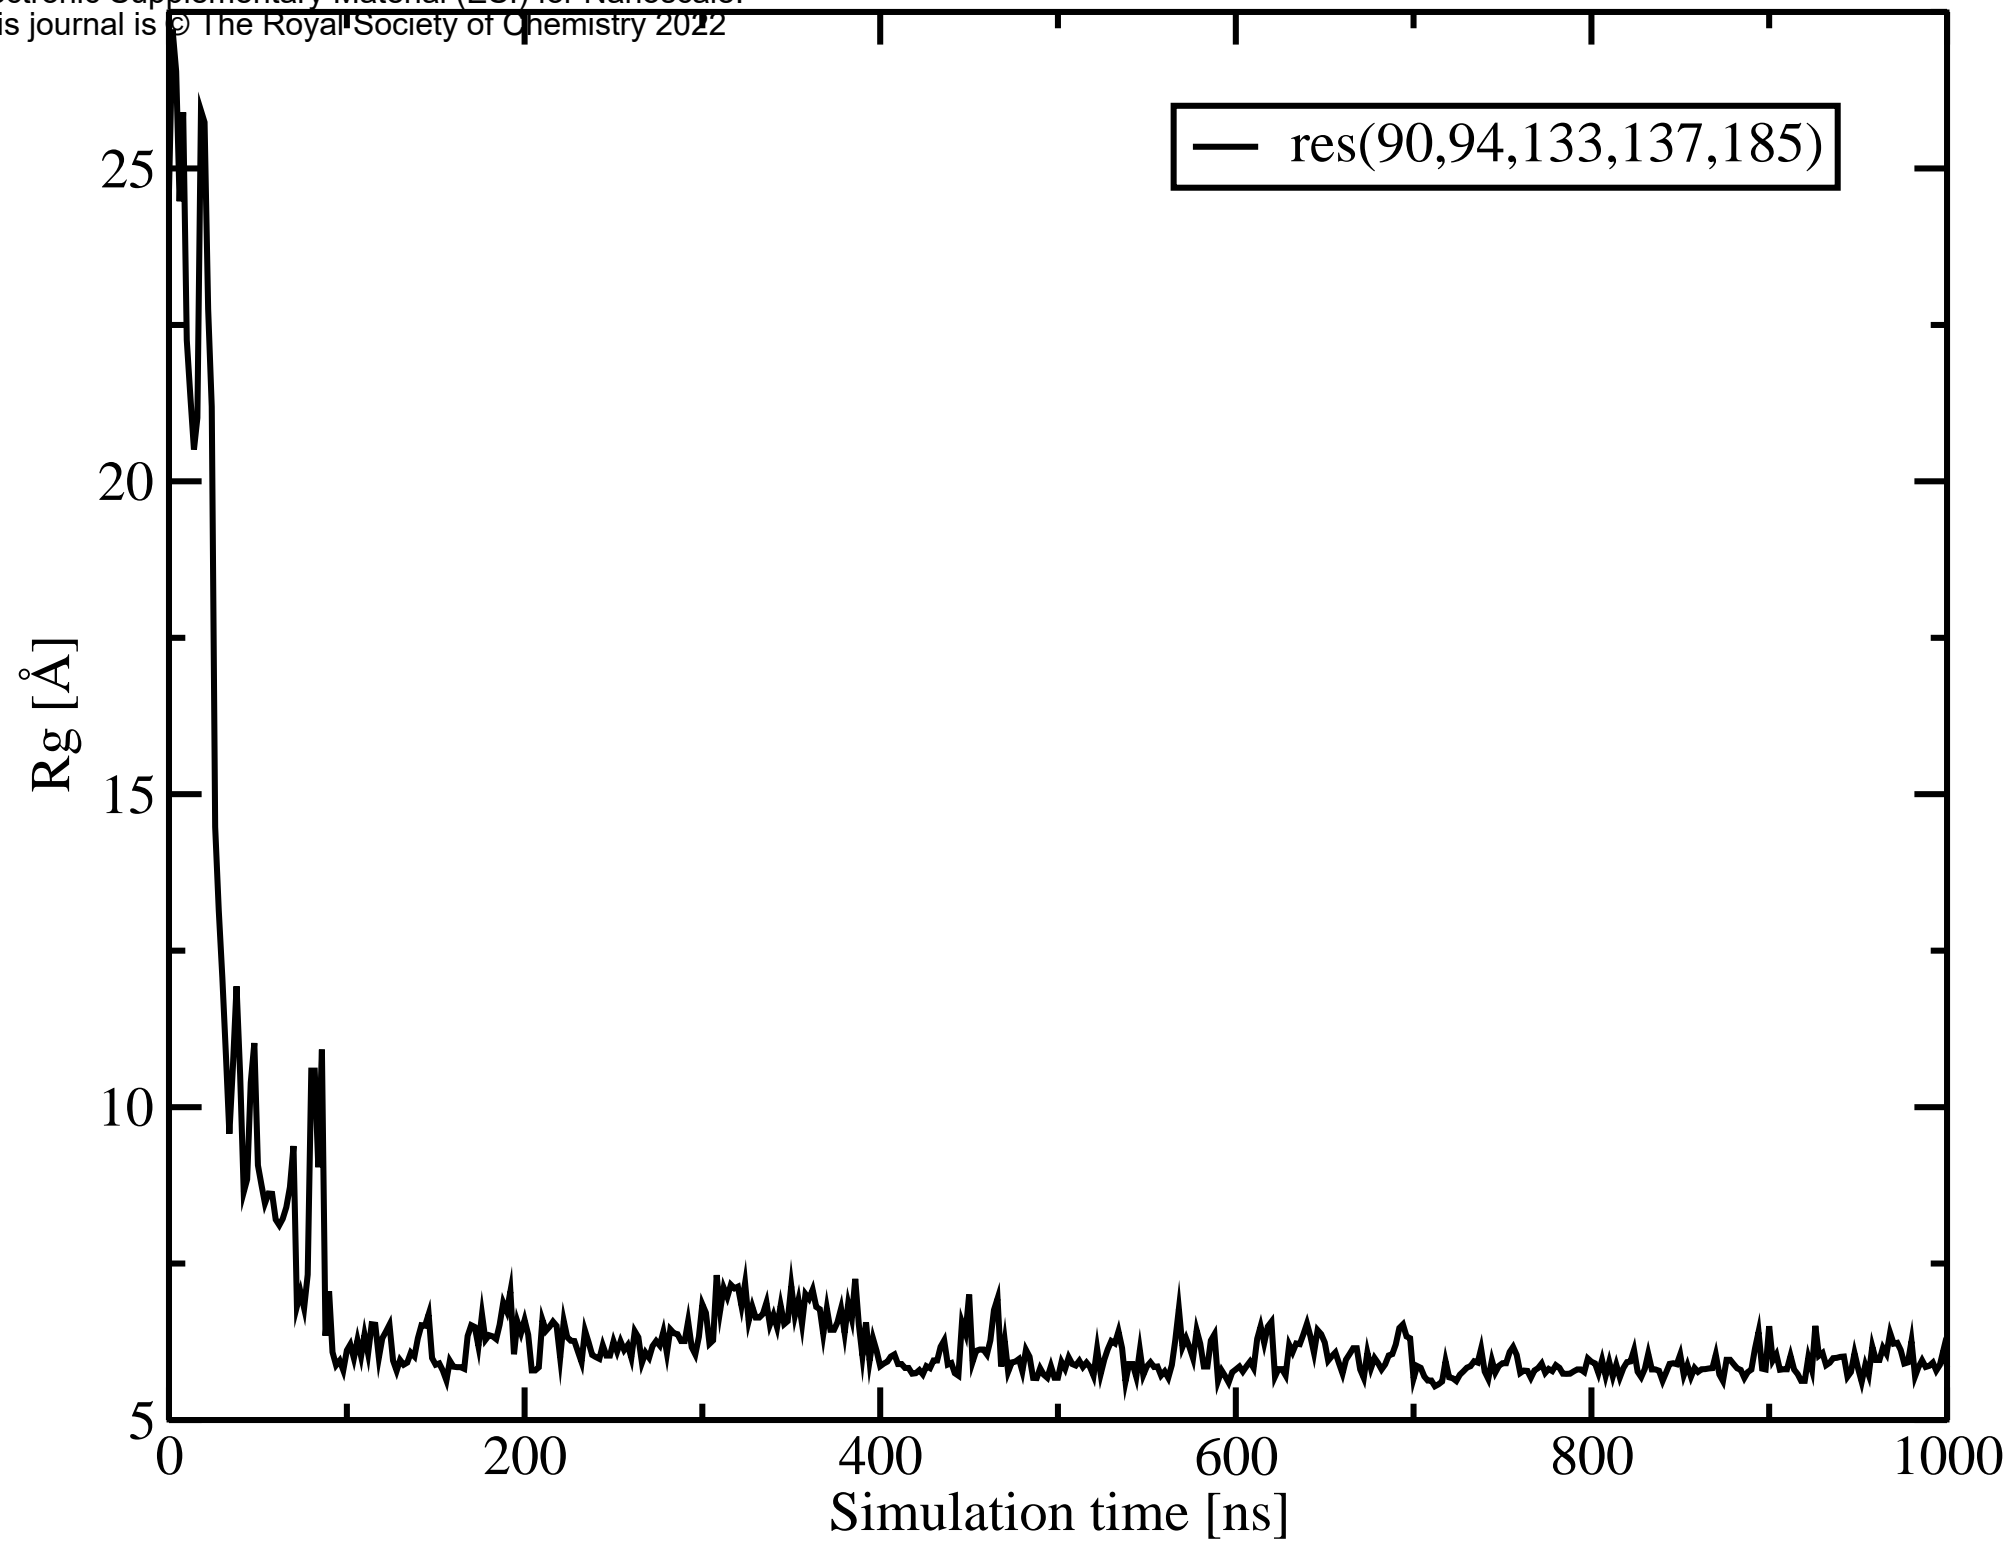

Supplement: d1nr07622a3.pdf [file d1nr07622a3.pdf]
